# Supplementary material for: RNAi-Mediated Down-Regulation of Dicer-Like 2 and 4 Changes the Response of &ldquo;Moneymaker&rdquo; Tomato to Potato Spindle Tuber Viroid Infection from Tolerance to Lethal Systemic Necrosis, Accompanied by Up-Regulation of miR398a-3p and Reactive Oxygen Species
Source: Preprints.org preprint supplement (doi:10.20944/preprints201811.0606.v1), 2018-11-28
Supplement: Supplementary file 1 [file supplementary]

1

**Table S1.** Names and sequences of PCR primers.

| Name of Primer      | Sequence (5' - 3')        |
|---------------------|---------------------------|
| 35S promoter primer |                           |
| forward             | AGGAAACAGCTATGACCATG      |
| reverse             | GAACTTCCTTATATAGAGGAAGG   |
| actin primer        |                           |
| forward             | GCCATGCCCTTTTAAATGGC      |
| reverse             | CAGTTGGAGGGGACTGAATC      |
| SLDCL1              |                           |
| forward             | GCATAAGGAACGGGGTTGTA      |
| reverse             | ATCTCTTCCACCACGACCAC      |
| SIDCL2a             |                           |
| forward             | GCTCGGGACGAGACAAAATA      |
| reverse             | GGAAGGCACATCCAAACAGT      |
| SIDCL2b             |                           |
| forward             | GAATGTCCATCTAATGCTACTGAAC |
| reverse             | AACGTGTCGTCTCACAAAGC      |
| SIDCL2c             |                           |
| forward             | TTGTTTGTGGAAACCAGCTAG     |
| reverse             | TCTTTCCAGAACCAGTCTCCA     |
| SIDCL2d             |                           |
| forward             | CAGGGCGTATTACTACGTTCAA    |
| reverse             | CAAGCCCTCTTCAAGAATCG      |
| SIDCL3              |                           |
| forward             | CGAAAAGCGCAAAAAGAAAC      |
| reverse             | CAGTGTGGCACATCAATTCC      |
| SIDCL4              |                           |
| forward             | GGAAGAGGTCGTAGAGCGATT     |
| reverse             | CACACCAATAACAGGCCACA      |
| SlActin             |                           |
| forward             | TGGGATGATATGGAGAAGATATGG  |
| reverse             | GGCTTCAGTTAGGAGGACAGGA    |

2

3

4

**Table S2.** Relative ROS production and relative ROS scavenging activity of the 5th and 7–8th true leaves.

| 5th leaves                                                                 |          |          |                                         |                     |                                       |                                    |                |         |
|----------------------------------------------------------------------------|----------|----------|-----------------------------------------|---------------------|---------------------------------------|------------------------------------|----------------|---------|
|                                                                            | 80 sec   | 120 sec  | Reactive light unit (RLU) <sup>※1</sup> | average control RLU | ROS scavenging rate (%) <sup>※2</sup> | avrease of ROS scavenging rate (%) | relative value | t value |
| control_1                                                                  | 6.80E+08 | 1.23E+09 | 5.50E+08                                | 5.56E+08            |                                       |                                    |                |         |
| control_2                                                                  | 8.94E+08 | 1.52E+09 | 6.22E+08                                |                     |                                       |                                    |                |         |
| control_3                                                                  | 1.03E+09 | 1.69E+09 | 6.59E+08                                |                     |                                       |                                    |                |         |
| control_4                                                                  | 6.53E+08 | 1.13E+09 | 4.81E+08                                |                     |                                       |                                    |                |         |
| control_5                                                                  | 6.64E+08 | 1.13E+09 | 4.68E+08                                |                     |                                       |                                    |                |         |
| Empty_H_1                                                                  | 5.98E+08 | 1.03E+09 | 4.32E+08                                |                     | 22.3                                  |                                    | 1.12           |         |
| Empty_H_2                                                                  | 6.09E+08 | 1.06E+09 | 4.47E+08                                |                     | 19.7                                  |                                    | 0.99           |         |
| Empty_H_3                                                                  | 6.36E+08 | 1.09E+09 | 4.58E+08                                |                     | 17.7                                  |                                    | 0.89           |         |
| Empty_PS_1                                                                 | 5.32E+08 | 9.49E+08 | 4.17E+08                                |                     | 25.0                                  |                                    | 1.26           |         |
| Empty_PS_2                                                                 | 5.58E+08 | 9.61E+08 | 4.03E+08                                |                     | 27.4                                  |                                    | 1.38           | 0.0681  |
| Empty_PS_3                                                                 | 5.29E+08 | 9.47E+08 | 4.18E+08                                |                     | 24.8                                  |                                    | 1.25           |         |
| 72E_H_1                                                                    | 5.03E+08 | 8.85E+08 | 3.82E+08                                |                     | 31.3                                  |                                    | 1.57           |         |
| 72E_H_2                                                                    | 4.80E+08 | 8.15E+08 | 3.35E+08                                |                     | 39.7                                  |                                    | 2.00           | 0.0530  |
| 72E_H_3                                                                    | 4.26E+08 | 7.60E+08 | 3.34E+08                                |                     | 39.8                                  |                                    | 2.00           |         |
| 72E_PS_1                                                                   | 4.84E+08 | 7.37E+08 | 2.54E+08                                |                     | 54.4                                  |                                    | 2.73           |         |
| 72E_PS_2                                                                   | 4.27E+08 | 6.64E+08 | 2.37E+08                                |                     | 57.3                                  |                                    | 2.88           | 0.0022  |
| 72E_PS_3                                                                   | 4.24E+08 | 6.91E+08 | 2.67E+08                                |                     | 52.0                                  |                                    | 2.61           |         |
| 7-8th leaves                                                               |          |          |                                         |                     |                                       |                                    |                |         |
|                                                                            | 80 sec   | 120 sec  | Reactive light unit (RLU) <sup>※1</sup> | average control RLU | ROS scavenging rate (%) <sup>※2</sup> | avrease of ROS scavenging rate (%) | relative value | t value |
| control_1                                                                  | 6.80E+08 | 1.23E+09 | 5.50E+08                                | 5.56E+08            |                                       |                                    |                |         |
| control_2                                                                  | 8.94E+08 | 1.52E+09 | 6.22E+08                                |                     |                                       |                                    |                |         |
| control_3                                                                  | 1.03E+09 | 1.69E+09 | 6.59E+08                                |                     |                                       |                                    |                |         |
| control_4                                                                  | 6.53E+08 | 1.13E+09 | 4.81E+08                                |                     |                                       |                                    |                |         |
| control_5                                                                  | 6.64E+08 | 1.13E+09 | 4.68E+08                                |                     |                                       |                                    |                |         |
| Empty_H_1                                                                  | 6.21E+08 | 1.08E+09 | 4.54E+08                                |                     | 18.3                                  |                                    | 0.92           |         |
| Empty_H_2                                                                  | 6.31E+08 | 1.09E+09 | 4.57E+08                                |                     | 17.7                                  |                                    | 0.89           |         |
| Empty_H_3                                                                  | 5.21E+08 | 9.69E+08 | 4.48E+08                                |                     | 19.4                                  |                                    | 0.97           |         |
| Empty_PS_1                                                                 | 6.50E+08 | 1.10E+09 | 4.54E+08                                |                     | 18.3                                  |                                    | 0.92           |         |
| Empty_PS_2                                                                 | 6.70E+08 | 1.12E+09 | 4.47E+08                                |                     | 19.6                                  |                                    | 0.98           | 0.1838  |
| Empty_PS_3                                                                 | 5.96E+08 | 1.03E+09 | 4.37E+08                                |                     | 21.3                                  |                                    | 1.07           |         |
| 72E_H_1                                                                    | 6.59E+08 | 1.09E+09 | 4.30E+08                                |                     | 22.7                                  |                                    | 1.14           |         |
| 72E_H_2                                                                    | 6.87E+08 | 1.14E+09 | 4.48E+08                                |                     | 19.4                                  |                                    | 0.97           | 0.1776  |
| 72E_H_3                                                                    | 7.08E+08 | 1.15E+09 | 4.44E+08                                |                     | 20.1                                  |                                    | 1.01           |         |
| 72E_PS_1                                                                   | 7.20E+08 | 1.16E+09 | 4.43E+08                                |                     | 20.4                                  |                                    | 1.03           |         |
| 72E_PS_2                                                                   | 8.19E+08 | 1.27E+09 | 4.46E+08                                |                     | 19.8                                  |                                    | 1.00           | 0.0585  |
| 72E_PS_3                                                                   | 6.82E+08 | 1.11E+09 | 4.25E+08                                |                     | 23.6                                  |                                    | 1.19           |         |
| ※1 120sec-80sec                                                            |          |          |                                         |                     |                                       |                                    |                |         |
| ※2 average control (4.62+E08) RLU - sample RLU x 100 / average control RLU |          |          |                                         |                     |                                       |                                    |                |         |

Reactive light unit (RLU) in this table means ROS production. ROS scavenging rate means ROS scavenging activity. AccuFLEX Lumi400 (Hitachi, Japan) was used for the mesurement.

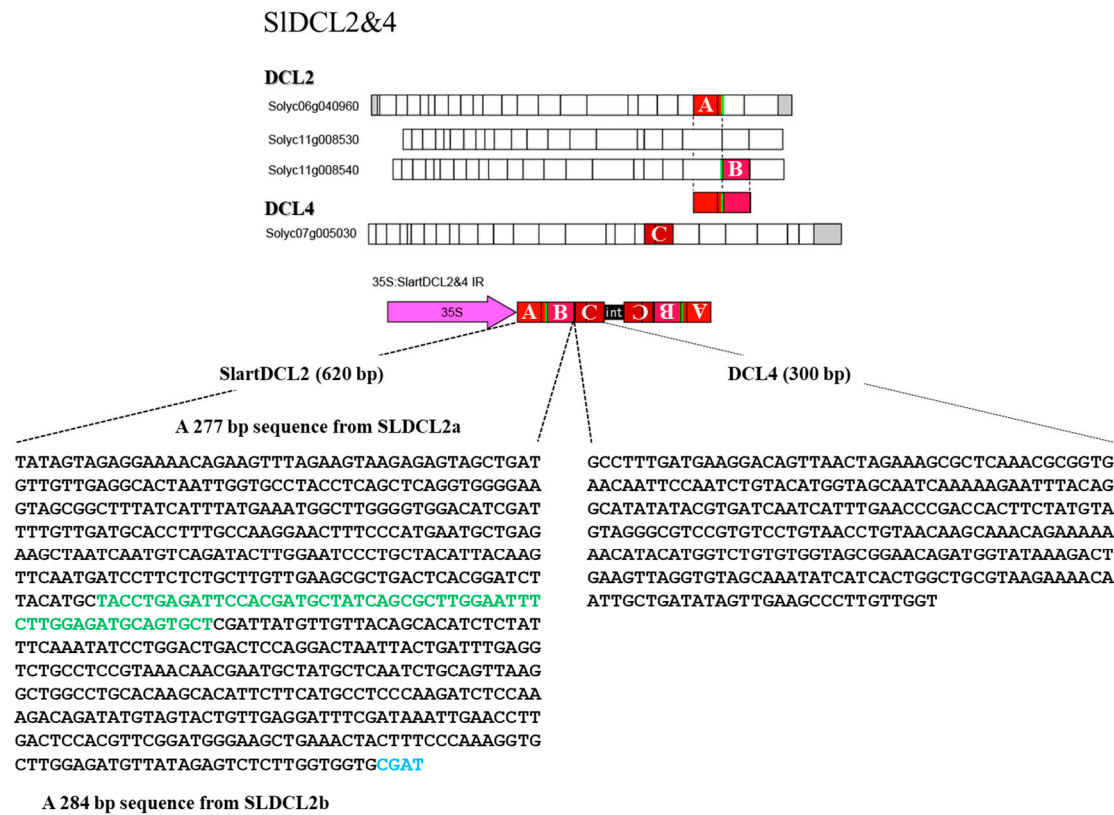

placing parts of DCL2 (A and B, 620 bp) and DCL4 (C, 300 bp) in head-to-head orientation across an intron sequence to create an IR sequence. SlartDCL2&4 IR was inserted into the SacII/SalI site of pBluescript II SK (+) plasmid, re-cloned into the BglII/KpnI site of binary vector pIG121-Hm downstream of the CaMV-35S promoter (35S:SlartDCL2&4 IR), and introduced into *Agrobacterium tumefaciens* strain EHA105 to transform tomato cv Moneymaker by the leaf disc method.

Supplementary figure 2

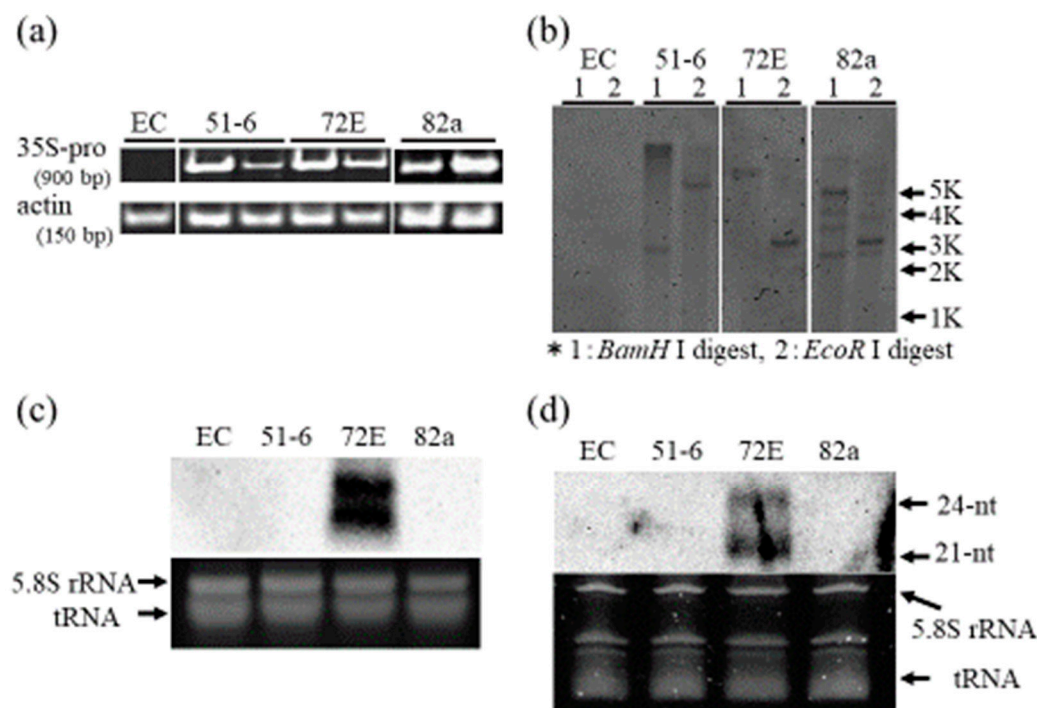

**Figure S2.** Northern-blot hybridization analysis of transgene transcripts (a), transgene siRNA (b) in three transgenic lines (hairpin DCL2/4-51-6, -72E, -82a) and the EC control line. (a) Total RNAs (~10 µg), extracted from three transgenic lines and the control line were separated in 1.2% agarose gel, transferred to nylon membrane and northern hybridized with a DIG-DCL2/4 cRNA probe. The upper panel shows the hybridization signal and the lower panel shows the loading control stained with ethidium bromide. The 72E line showed a dense hybridization signal. (b) Total RNAs (~10 µg), extracted from three transgenic lines and the control line were separated in 8M-urea 12% polyacrylamide gel, transferred to nylon membrane and northern hybridized with a DIG-DCL2/4 cRNA probe. The upper panel shows the hybridization signal and the lower panel shows the loading control stained with ethidium bromide. The 72E line showed two dense hybridization signals of the size ~21- and 24-nt.

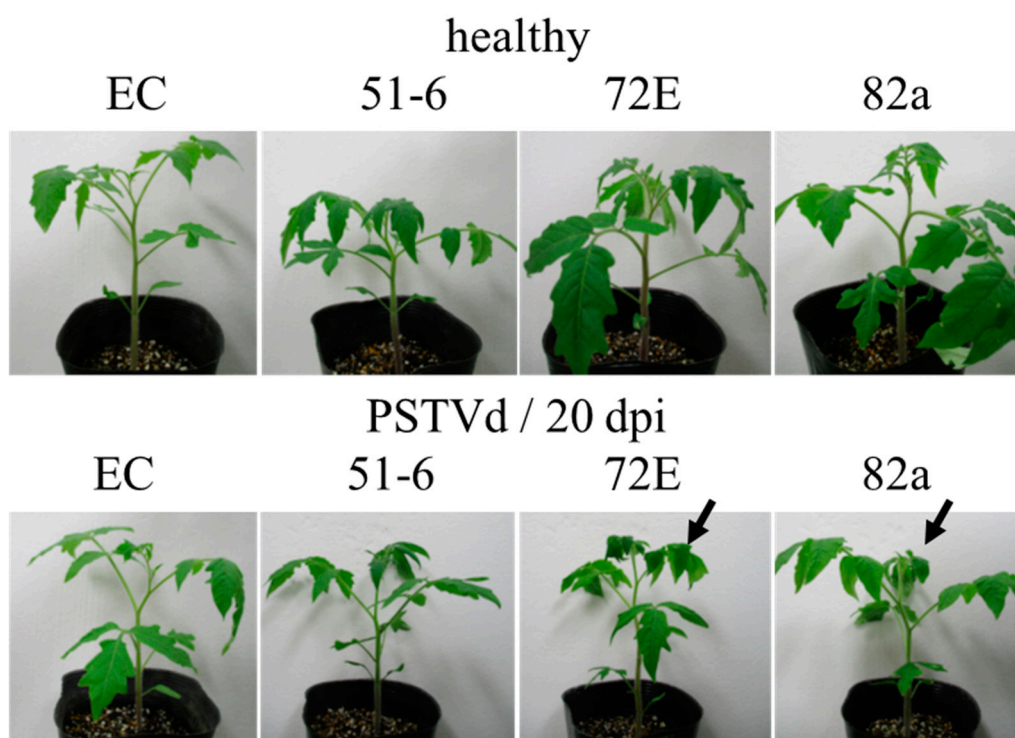

**Figure S3.** Primary symptoms associated with PSTVd infection in the DCL2/4i-72E and 82a Moneymaker tomato line. The arrows indicates mild leaf curling ~20 dpi.

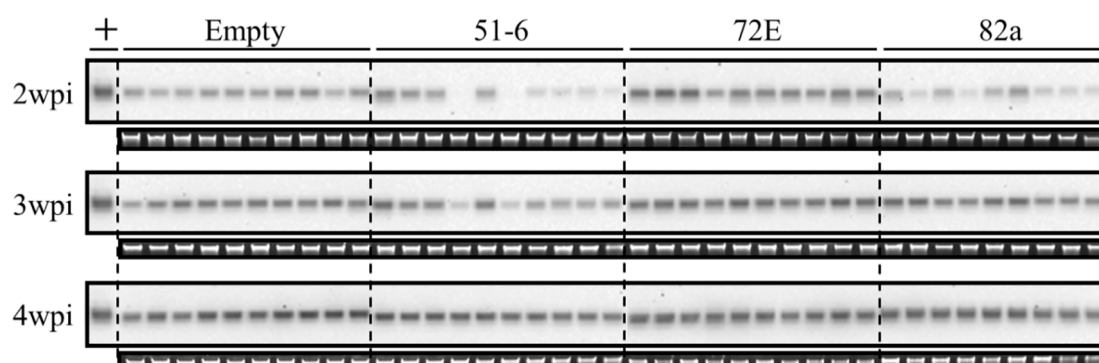

**Figure. S4** Northern-blot hybridization analysis to monitor the levels of PSTVd accumulation in DCL2/4i-51-6, 72E, and 82a lines. Total RNA extracted from the upper leaves of nine to ten individual tomato plants from each line at 2, 3, and 4 wpi was used to monitor the levels of PSTVd accumulation. PSTVd was detected in almost every inoculated plant, even at 2 wpi (10/10 plants infected in line EC, 8/10 in line 51-6, 10/10 in line 72E, and 9/9 in line 82a. One or two weeks later, all plants were infected.

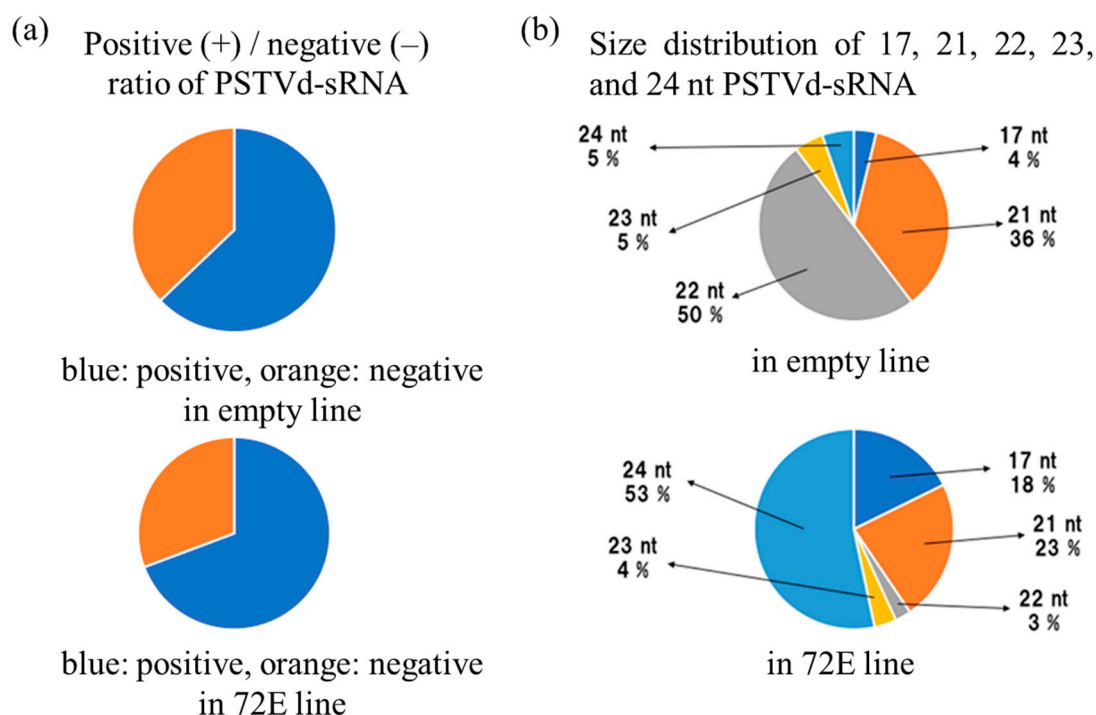

**Figure S5.** Overview of the changes in PSTVd-sRNA reads between PSTVd-72E and PSTVd-EC preparations. (a) PSTVd-sRNAs in PSTVd-72E comprised 383,947 reads (69%) from plus-strand and 170,091 reads (31%) from the minus-strand. This ratio was very similar in line EC; i.e., 318,585 reads (63%) to 188,092 reads (37%). (b) The most abundant size class in line EC was 22-nt (50%), followed by 21-nt (36%), 24-nt (5%), and 23-nt (5%), however, the most abundant size class in line 72E, was 24- (53%), followed by 21-nt (23%), 17-nt (18%), 23-nt (4%), and 22-nt (3%).

### number of read of PSTVd-sRNA

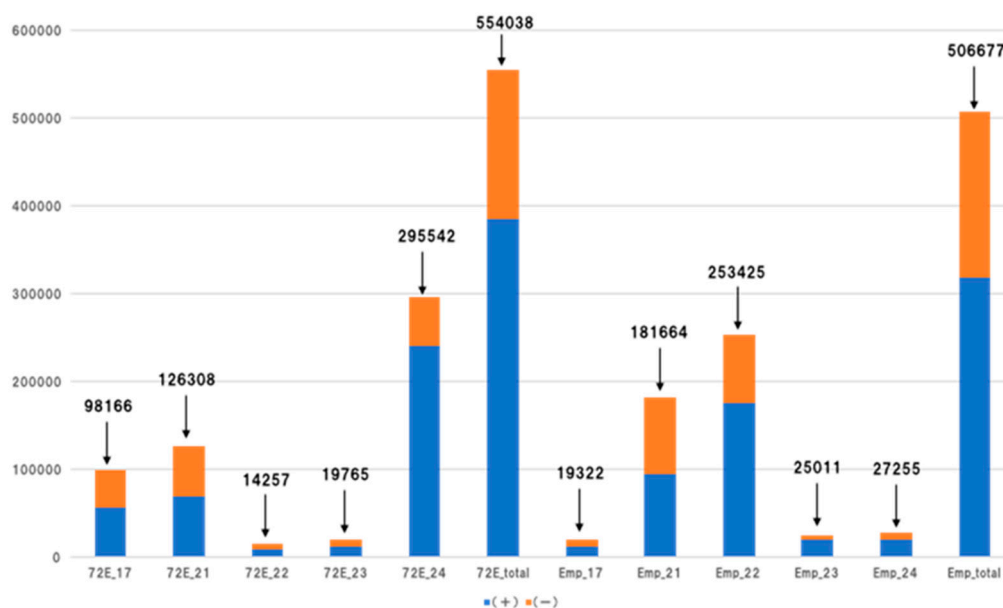

**Figure S6.** Histograms of the number of PSTVd-sRNA reads in 72E and EC (Emp in the figure). Five major PSTVd-sRNA size classes (i.e., 17, 21, 22, 23, and 24) were presented. The most abundant size class in line EC was 22-nt (50%), followed by 21-nt (36%), 24-nt (5%), and 23-nt (5%), however, the most abundant size class in line 72E, was 24-nt (53%), followed by 21-nt (23%), 17-nt (18%), 23-nt (4%), and 22-nt (3%).



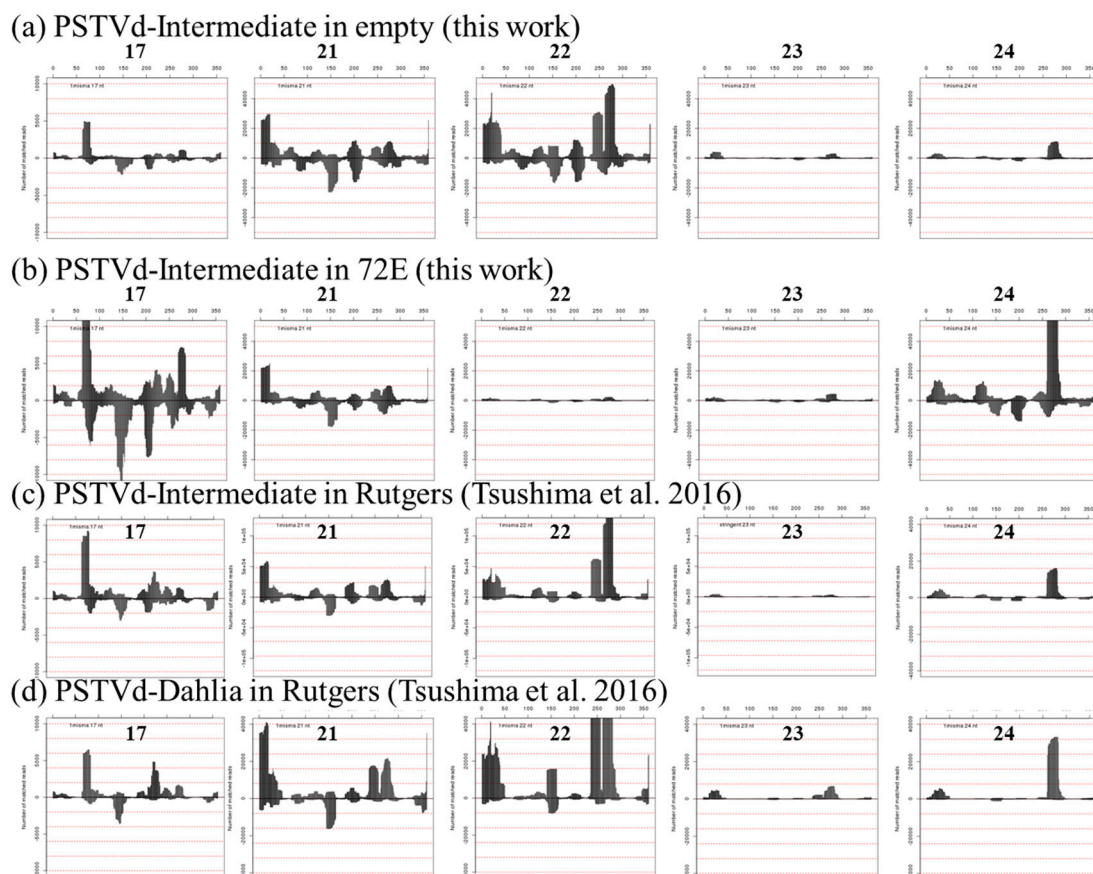

**Figure S7.** A comparison of hotspot pattern (size distribution and positive (+) / negative (–) ratio) of PSTVd-sRNAs of the size 17-nt, 21-nt, 22-nt, 23-nt, and 24-nt accumulated in the EC (a) and 72E (b) lines in this work, and in a similar analysis performed previously in Tsushima et al. [11]. Both of the analysis was performed by Hokkaido System Science Co., Ltd. (Sapporo, Japan) for small RNA sequence analysis (2Gb scale, paired end) using an Illumina HiSeq (Illumina, San Diego, CA, USA). Moneymaker tomato infected with PSTVd-intermediate was used in this work, and Rutgers tomato infected with PSTVd-Intermediate and PSTVd-Dahlia was used in the previous work. Nevertheless, the hotspot patterns seen in this work (a) was very similar to those in the earlier report (b and c), indicating a high degree of reproducibility among multiple deep sequencing analyses.

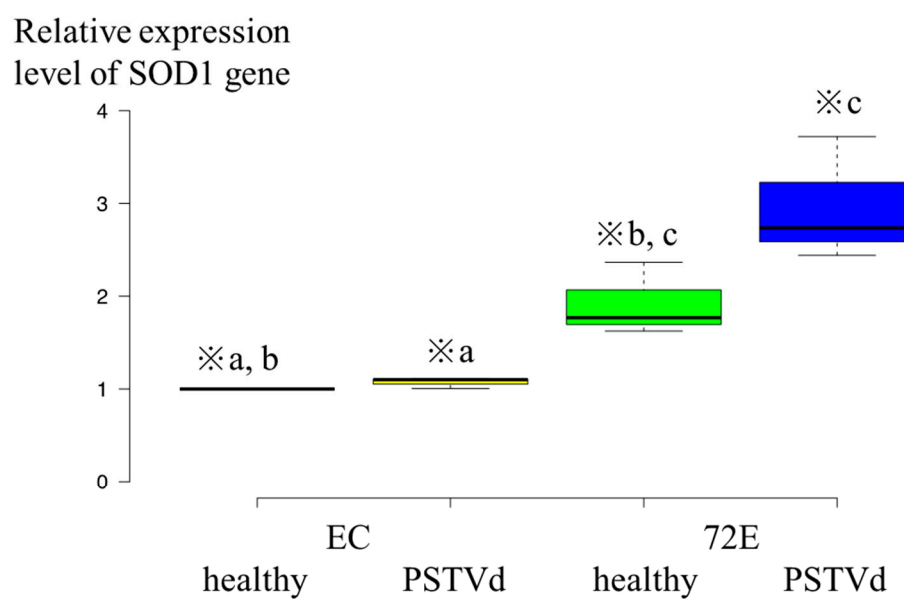

**Figure S8.** Statistical analysis of expression levels of SOD1 in healthy and PSTVd-infected EC and 72E lines. Band signals obtained from Fig. 6c and d by ChemiDoc XAR (BioRad) was quantified with Quantity One software (Bio-Rad) and normalized the value of healthy EC as 1.0. The analysis was repeated three. "a", "b", and "c" were statistically significant at 5% level ( $P < 0.05$ ).
